# Supplementary material
Source: PubMed Central journal article supplement (PMC2527474)
Supplement: NIHMS60944-supplement-si20060111_120.pdf [file NIHMS60944-supplement-si20060111_120.pdf]

## Supporting Information

Tables of means and standard errors for Figures 1-4 & 7.

Means and standard errors for Figure 1C

| CH % | Mean | SE    |
|------|------|-------|
| 0    | 1.83 | 0.042 |
| 5    | 1.71 | 0.091 |
| 10   | 2.17 | 0.100 |
| 15   | 3.34 | 0.042 |
| 20   | 4.25 | 0.304 |
| 33   | 4.6  | -     |

Means and standard errors for Figure 2B

| DOPA % | Mean | SE    |
|--------|------|-------|
| 0      | 1.06 | 0.254 |
| 1.25   | 1.35 | 0.212 |
| 2.5    | 1.7  | 0.092 |
| 5      | 3.83 | 0.202 |
| 20     | 4.48 | 0.304 |

Means and standard errors for Figure 3B

| DOPS % | Mean | SE    |
|--------|------|-------|
| 0      | 1.06 | 0.254 |
| 1.25   | 3.08 | 0.276 |
| 2.5    | 3.16 | -     |
| 5      | 3.25 | 0.269 |
| 10     | 2.94 | 0.315 |
| 20     | 3.08 | 0.382 |

Means and standard errors for Figure 4B

| PLPI % | Mean | SE    |
|--------|------|-------|
| 0      | 1.06 | 0.254 |
| 5      | 1.93 | 0.177 |
| 10     | 2.70 | 0.556 |
| 20     | 2.58 | 0.106 |

Means and standard errors for Figure 7

| Lipid : Protein Ratio<br>(mol/mol) | Mean | SE    |
|------------------------------------|------|-------|
| 9.7                                | 1.47 | 0.078 |
| 18.6                               | 1.71 | 0.304 |
| 30                                 | 1.67 | 0.233 |
| 40                                 | 3.07 | -     |
| 47.6                               | 3.13 | 0.231 |
| 64                                 | 4.55 | 0.983 |
| 125                                | 4.74 | 0.097 |
| 400                                | 4.6  | 0.201 |
